# Supplementary material for: On the halide aggregation into the [Au4(PPh3)4]4+ cluster core. Insights from structural, optical and interaction energy analysis in [(Ph3PAu)4X2]2+ and [(Ph3PAu)4X]3+ species (X = Cl−, Br−, I−)
Source: Royal Society of Chemistry journal article supplement (doi:10.1039/d4cp01467g), 2024-01-01
Supplement: d4cp01467g1.pdf [file d4cp01467g1.pdf]

Supporting information for:

## **On the Halide Aggregation into $[\text{Au}_4(\text{PPh}_3)_4]^{4+}$ Cluster Core. Insights from Structural, Optical and Interaction Energy Analysis in $[(\text{Ph}_3\text{PAu})_4\text{X}_2]^{2+}$ and $[(\text{Ph}_3\text{PAu})_4\text{X}]^{3+}$ species (X=Cl, Br, I)**

Raul Guajardo-Maturana,<sup>a</sup> Peter. L. Rodríguez-Kessler,<sup>b</sup> and Alvaro Muñoz-Castro<sup>c\*</sup>

<sup>a</sup>*Universidad SEK, Facultad de Ciencias de la Salud, Instituto de Investigación Interdisciplinaria en Ciencias Biomédicas SEK (I3CBSEK) Chile, Fernando Manterola 0789, Providencia, Santiago, Chile*

<sup>b</sup>*Centro de Investigaciones en Óptica A.C., Loma del Bosque 115, Col. Lomas del Campestre, León, Guanajuato, 37150, Mexico.*

<sup>c</sup>*Facultad de Ingeniería, Arquitectura y Diseño, Universidad San Sebastián, Bellavista 7, Santiago, 8420524, Chile.*

Content

Table S1. HOMO-LUMO gap (eV) for the studied species at the TZ2P/PBE and TZ2P/PBE0 level of theory. Page S2

Table S2. Energy decomposition analysis for the  $(\text{Ph}_3\text{PAu})_4^{4+}\text{-X}^-$  interaction in mono- and dihalide species, given per halide, at the hybrid TZ2P/PBE0 level of theory.   
Page S2

Table S1. HOMO-LUMO gap (eV) for the studied species at the TZ2P/PBE and TZ2P/PBE0 level of theory.

|    | PBE   | PBE0  |
|----|-------|-------|
| 1a | 3.05  | 4.786 |
| 2a | 3.033 | 4.619 |
| 3a | 3.089 | 4.719 |
|    |       |       |
| 1b | 1.713 | 3.227 |
| 2b | 1.521 | 2.995 |
| 3b | 1.254 | 2.695 |

Table S2. Energy decomposition analysis for the  $(\text{Ph}_3\text{PAu})_4^{4+}\text{-X}^-$  interaction in mono- and dihalide species, given per halide, at the hybrid TZ2P/PBE0 level of theory. Values in  $\text{kcal}\cdot\text{mol}^{-1}$ .

|                            | <b>1a</b> |       | <b>2a</b> |       | <b>3a</b> |       |
|----------------------------|-----------|-------|-----------|-------|-----------|-------|
| $\Delta E_{\text{Pauli}}$  | 193.2     |       | 184.6     |       | 200.9     |       |
| $\Delta E_{\text{elstat}}$ | -354.6    | 77.4% | -341.3    | 76.9% | -349.4    | 76.5% |
| $\Delta E_{\text{orb}}$    | -97.3     | 21.2% | -94.6     | 21.3% | -97.1     | 21.2% |
| $\Delta E_{\text{disp}}$   | -6.5      | 1.4%  | -7.9      | 1.8%  | -10.4     | 2.3%  |
|                            |           |       |           |       |           |       |
| $\Delta E_{\text{int}}$    | -265.1    |       | -259.2    |       | -255.9    |       |
|                            |           |       |           |       |           |       |
|                            | <b>1b</b> |       | <b>2b</b> |       | <b>3b</b> |       |
| $\Delta E_{\text{Pauli}}$  | 211.9     |       | 190.1     |       | 208.3     |       |
| $\Delta E_{\text{elstat}}$ | -425.2    | 79.2% | -395.1    | 77.0% | -401.0    | 77.8% |
| $\Delta E_{\text{orb}}$    | -105.9    | 19.7% | -111.3    | 21.7% | -105.0    | 20.4% |
| $\Delta E_{\text{disp}}$   | -5.5      | 1.0%  | -6.4      | 1.2%  | -9.5      | 1.8%  |
|                            |           |       |           |       |           |       |
| $\Delta E_{\text{int}}$    | -324.7    |       | -322.7    |       | -307.2    |       |
